# Supplementary material for: Carbon electrode engineering for high efficiency all-inorganic perovskite solar cells
Source: Royal Society of Chemistry journal article supplement (doi:10.1039/d0ra00288g), 2020-01-01
Supplement: d0ra00288g1.pdf [file d0ra00288g1.pdf]

## Supporting information

### Carbon electrode engineering for high efficiency all inorganic perovskite solar cells

Longfei Mi<sup>\*ab</sup>, Yan Zhang<sup>b</sup>, Taotao Chen<sup>b</sup>, Enze Xu<sup>b</sup> and Yang Jiang<sup>b\*</sup>

<sup>a</sup>Department of Materials Science and Engineering, School of Civil Engineering, Qingdao University of Technology, Qingdao, Shandong, 266000, P. R. China.

<sup>b</sup>School of Materials Science and Engineering, Hefei University of Technology, Hefei, Anhui, 230009, P. R. China.

Table S1 Comparison of CsPbBr<sub>3</sub> PSCs with carbon electrode.

| Device                                                                        | V <sub>oc</sub><br>(V) | J <sub>sc</sub><br>(mA cm <sup>-2</sup> ) | FF<br>(%)    | PCE<br>(%)  | Ref.                                                      |
|-------------------------------------------------------------------------------|------------------------|-------------------------------------------|--------------|-------------|-----------------------------------------------------------|
| <b>FTO/TiO<sub>2</sub>/CsPbBr<sub>3</sub>/Mixed carbon</b>                    | <b>1.357</b>           | <b>7.16</b>                               | <b>72.97</b> | <b>7.09</b> | <b><i>This work</i></b>                                   |
| FTO/CsPbBr <sub>3</sub> /carbon                                               | 1.05                   | 4.64                                      | 48.2         | 2.35        | <i>Small</i> 2018, 14, 1704443                            |
| FTO/TiO <sub>2</sub> /CsPbBr <sub>3</sub> /Carbon                             | 1.29                   | 5.7                                       | 68           | 5.6         | <i>ACS Appl. Mater. Interfaces.</i> 2016, 8, 33649-33655. |
| FTO/TiO <sub>2</sub> /CsPbBr <sub>3</sub> /Carbon                             | 1.24                   | 7.4                                       | 73           | 6.7         | <i>J. Am. Chem. Soc.</i> 2016, 138, 15829-15832.          |
| FTO/TiO <sub>2</sub> /CsPbBr <sub>3</sub> /Carbon                             | 1.522                  | 7.24                                      | 80.4         | 8.86        | <i>Mater. Sci. Semicond. Process.</i> 2019, 98, 39        |
| FTO/TiO <sub>2</sub> /CsPbBr <sub>3</sub> /CuPc/<br>Carbon                    | 1.26                   | 6.62                                      | 74.4         | 6.21        | <i>Nano-Micro Lett.</i> 2018, 10, 34.                     |
| FTO/TiO <sub>2</sub> /CsPbBr <sub>3</sub> /Carbon:<br>PtNiNW                  | 1.432                  | 6.78                                      | 81.0         | 7.86        | <i>ChemSusChem</i> 2018, 11, 1432                         |
| FTO/TiO <sub>2</sub> /CsPbBr <sub>3</sub> /MXene/<br>Carbon                   | 1.444                  | 8.54                                      | 73.08        | 9.01        | <i>J. Mater. Chem. A</i> 2019, 7, 20597                   |
| FTO/TiO <sub>2</sub> /CsPbBr <sub>3</sub> /MnS/<br>Carbon                     | 1.52                   | 8.28                                      | 83           | 10.45       | <i>ACS Appl. Mater. Interfaces</i> 2019, 11, 29746.       |
| FTO/TiO <sub>2</sub> /CsPbBr <sub>3</sub> /Cu(Cr,<br>M)O <sub>2</sub> /Carbon | 1.165                  | 7.81                                      | 85.5         | 10.79       | <i>Angew. Chem. Int. Ed.</i> 2019, 58, 1-6.               |

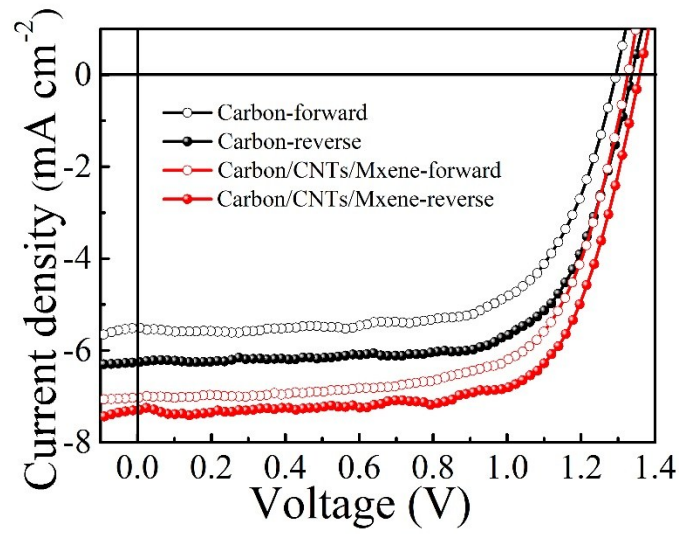

**Fig. S1** J-V curves of the devices under forward and reverse scan.

**Table S2** Parameters of CsPbBr<sub>3</sub> PSCs under forward and reverse scan.

| Device                        | V <sub>oc</sub> (V) | J <sub>sc</sub> (mA cm <sup>-2</sup> ) | FF (%) | PCE (%) |
|-------------------------------|---------------------|----------------------------------------|--------|---------|
| Carbon-forward                | 1.293               | 5.54                                   | 69.38  | 4.97    |
| Carbon-reverse                | 1.336               | 6.15                                   | 71.44  | 5.87    |
| Carbon/CNTs/MXene<br>-forward | 1.327               | 6.98                                   | 68.46  | 6.34    |
| Carbon/CNTs/MXene<br>-reverse | 1.357               | 7.16                                   | 72.97  | 7.09    |
